# Supplementary material
Source: ML conference proceedings conference paper supplement (https://aclanthology.org/D16-1122)
Supplement: Attachment [file D16-1122.Attachment.zip]

# Detecting and Characterizing Events: Appendices

**Allison J. B. Chaney**  
Princeton University  
achaney@cs.princeton.edu

**Hanna Wallach**  
Microsoft Research  
wallach@microsoft.com

**Matthew Connelly**  
Columbia University  
mjc96@columbia.edu

**David M. Blei**  
Columbia University  
david.blei@columbia.edu

## A Inference

In this appendix, we describe the details of the approximate inference algorithm for Capsule.

Conditioned on the observed term counts— $n_{dv}$  for vocabulary term  $v$  in message  $d$ ; collectively  $\mathbf{N}$ —our goal is to learn the posterior distribution of the latent variables. Each message is associated with an author entity  $a_d$  and a time interval  $t_d$  within which that messages was sent. The latent variables are the general topics  $\beta_1, \dots, \beta_K$ , the entity topics  $\eta_1, \dots, \eta_A$ , and the event topics  $\gamma_1, \dots, \gamma_T$ , as well as the message-specific strengths  $\theta_1, \dots, \theta_D$ ,  $\zeta_1, \dots, \zeta_D$ , and  $\epsilon_1, \dots, \epsilon_D$ , the entity-specific strengths  $\phi_1, \dots, \phi_A$  and  $\xi_1, \dots, \xi_A$ , and the event strengths  $\psi_1, \dots, \psi_T$ . See figures 3 and 4 for the graphical model and generative process.

As for many Bayesian models, the posterior distribution is not tractable to compute; we must instead approximate it. We therefore introduce an approximate inference algorithm for Capsule, based on variational methods (Jordan et al., 1999; Wainwright and Jordan, 2008). Variational methods approximate the true posterior distribution  $p$  with a (simpler) variational distribution  $q$ . Inference then consists of minimizing the KL divergence from  $q$  to  $p$ . This is equivalent to maximizing the evidence lower bound (ELBO):

$$\mathcal{L}(q) = \mathbb{E}_q [\log p(\mathbf{N}, \beta, \eta, \gamma, \theta, \zeta, \epsilon, \phi, \xi, \psi) - \log q(\beta, \eta, \gamma, \theta, \zeta, \epsilon, \phi, \xi, \psi)]. \quad (10)$$

We define  $q$  using the mean field assumption:

$$\begin{aligned} q(\beta, \eta, \gamma, \theta, \zeta, \epsilon, \phi, \xi, \psi) = & \prod_{d=1}^D \left( q(\zeta_d | \lambda_d) \prod_{k=1}^K q(\theta_{dk} | \lambda_{dk}^\theta) \prod_{t=1}^T q(\epsilon_{dt} | \lambda_{dt}^\epsilon) \right) \times \\ & \prod_{k=1}^K \left( q(\beta_k | \lambda_k^\beta) \prod_{a=1}^A q(\phi_{ak} | \lambda_{ak}^\phi) \right) \prod_{a=1}^A \left( q(\eta_a | \lambda_a^\eta) q(\xi_a | \lambda_a^\xi) \right) \prod_{t=1}^T \left( q(\gamma_t | \lambda_t^\gamma) q(\psi_t | \lambda_t^\psi) \right) \end{aligned} \quad (11)$$

The variational distributions for the topics  $q(\beta_k)$ ,  $q(\eta_a)$ , and  $q(\gamma_t)$  are all Dirichlet distributions with free variational parameters  $\lambda_k^\beta$ ,  $\lambda_a^\eta$ , and  $\lambda_t^\gamma$ , respectively. The variational distributions for the strengths  $q(\theta_{dk})$ ,  $q(\zeta_d)$ ,  $q(\epsilon_{dt})$ ,  $q(\phi_{ak})$ ,  $q(\xi_a)$ , and  $q(\psi_t)$  are all gamma distributions with free variational parameters  $\lambda_{dk}^\theta$ ,  $\lambda_d^\zeta$ ,  $\lambda_{dt}^\epsilon$ ,  $\lambda_{ak}^\phi$ ,  $\lambda_a^\xi$ , and  $\lambda_t^\psi$ , respectively. Each of these parameters has two components: shape  $s$  and rate  $r$ .

The expectations under  $q$ , which we need to maximize the ELBO, have closed analytic forms. We therefore update each free variational parameter in turn, following a standard coordinate-ascent approach.

To obtain update equations for the free variational parameters, we introduce auxiliary latent variables:

$$z_{dkv}^{\mathcal{K}} \sim \text{Poisson}(\theta_{dk}\beta_{kv}) \quad (12)$$

$$z_{dv}^{\mathcal{A}} \sim \text{Poisson}(\zeta_d\eta_{av}) \quad (13)$$

$$z_{d tv}^{\mathcal{T}} \sim \text{Poisson}(f(t_d, t)\epsilon_{dt}\gamma_{tv}), \quad (14)$$

where the superscripts  $\mathcal{K}$ ,  $\mathcal{A}$ , and  $\mathcal{T}$  indicate the general, entity, and event topics, respectively. When marginalized out, these variables—collectively  $\mathbf{z}$ —leave the model intact. Because the Poisson distribution has an additive property, the value of  $n_{dv}$  is completely determined by the values of these variables:

$$n_{dv} = \sum_{k=1}^K z_{dkv}^{\mathcal{K}} + z_{dv}^{\mathcal{A}} + \sum_{t=1}^T z_{d tv}^{\mathcal{T}}. \quad (15)$$

Coordinate-ascent variational inference depends on the conditional distribution of each latent variable given the values of the other latent variables and the data. We use  $D(a)$  to denote the set of messages sent by entity  $a$  and  $D(t)$  to denote the set of messages potentially affected by event  $t$  (e.g., all messages sent after time interval  $t$ , in the case of an exponential decay function). The conditional distributions are:

$$(\beta_k \mid \mathbf{N}, \mathbf{z}, \boldsymbol{\eta}, \boldsymbol{\gamma}, \boldsymbol{\theta}, \boldsymbol{\zeta}, \boldsymbol{\epsilon}, \boldsymbol{\phi}, \boldsymbol{\xi}, \boldsymbol{\psi}) \sim \text{Dirichlet}_V \left( \alpha + \sum_{d=1}^D z_{dk1}^{\mathcal{K}}, \dots, \alpha + \sum_{d=1}^D z_{dkV}^{\mathcal{K}} \right) \quad (16)$$

$$(\eta_a \mid \mathbf{N}, \mathbf{z}, \boldsymbol{\beta}, \boldsymbol{\gamma}, \boldsymbol{\theta}, \boldsymbol{\zeta}, \boldsymbol{\epsilon}, \boldsymbol{\phi}, \boldsymbol{\xi}, \boldsymbol{\psi}) \sim \text{Dirichlet}_V \left( \alpha + \sum_{d \in D(a)} z_{d1}^{\mathcal{A}}, \dots, \alpha + \sum_{d \in D(a)} z_{dV}^{\mathcal{A}} \right) \quad (17)$$

$$(\gamma_t \mid \mathbf{N}, \mathbf{z}, \boldsymbol{\beta}, \boldsymbol{\eta}, \boldsymbol{\theta}, \boldsymbol{\zeta}, \boldsymbol{\epsilon}, \boldsymbol{\phi}, \boldsymbol{\xi}, \boldsymbol{\psi}) \sim \text{Dirichlet}_V \left( \alpha + \sum_{d \in D(t)} z_{d1t}^{\mathcal{T}}, \dots, \alpha + \sum_{d \in D(t)} z_{dVt}^{\mathcal{T}} \right) \quad (18)$$

$$(\theta_{dk} \mid \mathbf{N}, \mathbf{z}, \boldsymbol{\beta}, \boldsymbol{\eta}, \boldsymbol{\gamma}, \boldsymbol{\zeta}, \boldsymbol{\epsilon}, \boldsymbol{\phi}, \boldsymbol{\xi}, \boldsymbol{\psi}) \sim \text{Gamma} \left( s + \sum_{v=1}^V z_{dkv}^{\mathcal{K}}, \phi_{ak} + \sum_{v=1}^V \beta_{kv} \right) \quad (19)$$

$$(\zeta_d \mid \mathbf{N}, \mathbf{z}, \boldsymbol{\beta}, \boldsymbol{\eta}, \boldsymbol{\gamma}, \boldsymbol{\theta}, \boldsymbol{\epsilon}, \boldsymbol{\phi}, \boldsymbol{\xi}, \boldsymbol{\psi}) \sim \text{Gamma} \left( s + \sum_{v=1}^V z_{dv}^{\mathcal{A}}, \xi_{ad} + \sum_{v=1}^V \eta_{av} \right) \quad (20)$$

$$(\epsilon_{dt} \mid \mathbf{N}, \mathbf{z}, \boldsymbol{\beta}, \boldsymbol{\eta}, \boldsymbol{\gamma}, \boldsymbol{\theta}, \boldsymbol{\zeta}, \boldsymbol{\phi}, \boldsymbol{\xi}, \boldsymbol{\psi}) \sim \text{Gamma} \left( s + \sum_{v=1}^V z_{d tv}^{\mathcal{T}}, \psi_t + f(t_d, t) \sum_{v=1}^V \gamma_{tv} \right) \quad (21)$$

$$(\phi_{ak} \mid \mathbf{N}, \mathbf{z}, \boldsymbol{\beta}, \boldsymbol{\eta}, \boldsymbol{\gamma}, \boldsymbol{\theta}, \boldsymbol{\zeta}, \boldsymbol{\epsilon}, \boldsymbol{\xi}, \boldsymbol{\psi}) \sim \text{Gamma} \left( s + |D(a)|s, r + \sum_{d \in D(a)} \theta_{dk} \right) \quad (22)$$

$$(\xi_a \mid \mathbf{N}, \mathbf{z}, \boldsymbol{\beta}, \boldsymbol{\eta}, \boldsymbol{\gamma}, \boldsymbol{\theta}, \boldsymbol{\zeta}, \boldsymbol{\epsilon}, \boldsymbol{\phi}, \boldsymbol{\psi}) \sim \text{Gamma} \left( s + |D(a)|s, r + \sum_{d \in D(a)} \zeta_d \right) \quad (23)$$

$$(\psi_t \mid \mathbf{N}, \mathbf{z}, \boldsymbol{\beta}, \boldsymbol{\eta}, \boldsymbol{\gamma}, \boldsymbol{\theta}, \boldsymbol{\zeta}, \boldsymbol{\epsilon}, \boldsymbol{\phi}, \boldsymbol{\xi}) \sim \text{Gamma} \left( s + |D(t)|s, r + \sum_{d \in D(t)} \epsilon_{dt} \right). \quad (24)$$

The conditional distribution of the auxiliary latent variables is:

$$(\langle \mathbf{z}_{dv}^{\mathcal{K}}, \mathbf{z}_{dv}^{\mathcal{A}}, \mathbf{z}_{dv}^{\mathcal{T}} \rangle \mid \mathbf{N}, \boldsymbol{\beta}, \boldsymbol{\eta}, \boldsymbol{\gamma}, \boldsymbol{\theta}, \boldsymbol{\zeta}, \boldsymbol{\epsilon}, \boldsymbol{\phi}, \boldsymbol{\xi}, \boldsymbol{\psi}) \sim \text{Mult}(n_{dv}, \boldsymbol{\omega}_{dv}), \quad (25)$$

where

$$\boldsymbol{\omega}_{dv} \propto \langle \theta_{d1}\beta_{1v}, \dots, \theta_{dK}\beta_{Kv}, \zeta_d\eta_{adv}, f(t_d, 1)\epsilon_{d1}\gamma_{1v}, \dots, f(t_d, T)\epsilon_{dT}\gamma_{Tv} \rangle. \quad (26)$$

Given the conditional distributions, coordinate-ascent variational inference involves setting each free variational parameter to the expected value of the corresponding model parameter under the variational distribution. We provide pseudocode in [algorithm 1](#); we use  $\boldsymbol{\lambda}$  to denote the entire set of free variational parameters and  $V(d)$  to denote the set of vocabulary terms present in document  $d$ . Our approximate inference algorithm produces a fitted variational posterior distribution which can then be used as a proxy for the true posterior distribution. The source code is available online at <https://github.com/ajbc/capsule>.

## B Additional Results

In this appendix, we provide additional results for Capsule. [Table 5](#) lists the highest-ranked messages for an event described in [section 5](#). [Tables 6](#) and [7](#) contain examples of general topics and entity topics, respectively.

### B.1 Decay Functions

We assessed Capsule’s sensitivity to several decay functions. We considered an exponential function,

$$f(t_d, t) = \begin{cases} 0 & t \leq t_d < t + \tau \\ \exp\left(\frac{-(t_d - t)}{\tau/5}\right) & \text{otherwise,}^1 \end{cases} \quad (27)$$

a linear function,

$$f(t_d, t) = \begin{cases} 1 - \frac{(t_d - t)}{\tau} & t \leq t_d < t + \tau \\ 0 & \text{otherwise,} \end{cases} \quad (28)$$

and a step function,

$$f(t_d, t) = \begin{cases} 1 & t \leq t_d < t + \tau \\ 0 & \text{otherwise.} \end{cases} \quad (29)$$

For each decay function, we used Capsule’s generative process, with  $\tau = 3$ , to create ten simulated data sets. We used three versions of our approximate inference algorithm—one for each decay function—to obtain a fitted variational distribution for each data set. We experimented with  $\tau = 1, \dots, 5$ . [Figure 7](#) shows event detection results (using [equation \(8\)](#)) and message identification results (using precision at ten messages).

As expected, Capsule performs best when the decay function used in the inference algorithm matches the decay function used to generate the data. For both event detection and message identification, the exponential function is least sensitive to the value of  $\tau$  used to generate the data and the value of  $\tau$  used in the inference algorithm. We also found that the exponential function gave the most interpretable results for real messages.

<sup>1</sup>Unlike the linear and step functions, the exponential function could be evaluated for any time interval  $t$  after message  $d$ ’s appearance at  $t_d$ ; however, we truncate the function for computational reasons. The mean lifetime of the exponential decay is  $\tau$  divided by five, which ensures that 99.3% of the area under the curve has occurred before we truncate the function at  $\tau$ .

---

**Algorithm 1:** Coordinate-ascent variational inference for Capsule.

---

**Input:** observed term counts  $\mathbf{N}$

**Output:** approximate posterior distribution of the latent variables, in terms of free variational parameters  $\lambda$

**Initialize**  $\mathbb{E}[\beta_k]$  to slightly random around uniform for each general topic  $k$

**Initialize**  $\mathbb{E}[\text{all other latent variables}]$  to uniform

**for** iteration  $m = 1, \dots, M$  **do**

**set**  $\lambda^{\theta,r}, \lambda^{\xi,r}$ , and  $\lambda^{\epsilon,r}$  to 0 and set remaining  $\lambda$  using priors

**update**  $\lambda_{dk}^{\theta,r} += \sum_v \mathbb{E}[\beta_{kv}]$  for each message  $d$  and general topic  $k$

**for** message  $d = 1, \dots, D$  **do**

**for** term  $v \in V(d)$  **do**

**set**  $\omega_{dv}$  using expected values of the latent variables (equation (26))

**set**  $\mathbb{E}[\langle \mathbf{z}_{dv}^{\mathcal{K}}, \mathbf{z}_{dv}^{\mathcal{A}}, \mathbf{z}_{dv}^{\mathcal{T}} \rangle] = n_{dv} \omega_{dv}$

**update**  $\lambda_{kv}^{\beta} += \mathbb{E}[z_{dkv}^{\mathcal{K}}]$  for each general topic  $k$  (equation (16))

**update**  $\lambda_{av}^{\eta} += \mathbb{E}[z_{dv}^{\mathcal{A}}]$  (equation (17))

**update**  $\lambda_{tv}^{\gamma} += \mathbb{E}[z_{dtv}^{\mathcal{T}}]$  for each time interval  $t$  (equation (18))

**update**  $\lambda_{dk}^{\theta,s} += \mathbb{E}[z_{dkv}^{\mathcal{K}}]$  for each general topic  $k$  (equation (19))

**update**  $\lambda_d^{\xi,s} += \mathbb{E}[z_{dv}^{\mathcal{A}}]$  (equation (20))

**update**  $\lambda_{dt}^{\epsilon,s} += \mathbb{E}[z_{dtv}^{\mathcal{K}}]$  for each time interval  $t$  (equation (21))

**end**

**set**  $\lambda_{dk}^{\theta,r} = \mathbb{E}[\phi_{dk}] + \sum_v \mathbb{E}[\beta_{kv}]$  for each general topic  $k$  (equation (19))

**set**  $\lambda_d^{\xi,r} = \mathbb{E}[\xi_{ad}] + \sum_v \mathbb{E}[\eta_{adv}]$  (equation (20))

**set**  $\lambda_{dt}^{\epsilon,r} = \mathbb{E}[\psi_t] + f(t_d, t) \sum_v \mathbb{E}[\gamma_{tv}]$  for each time interval  $t$  (equation (21))

**set**  $\mathbb{E}[\theta_{dk}] = \lambda_{dk}^{\theta,s} / \lambda_{dk}^{\theta,r}$  for each general topic  $k$

**set**  $\mathbb{E}[\xi_d] = \lambda_d^{\xi,s} / \lambda_d^{\xi,r}$

**set**  $\mathbb{E}[\epsilon_{dt}] = \lambda_{dt}^{\epsilon,s} / \lambda_{dt}^{\epsilon,r}$  for each time interval  $t$

**update**  $\lambda_{adk}^{\phi,s} += s$  for each general topic  $k$  (equation (22))

**update**  $\lambda_{ad}^{\xi,s} += s$  (equation (23))

**update**  $\lambda_t^{\psi,s} += s$  for each time interval  $t$  where  $f(t_d, t) \neq 0$  (equation (24))

**update**  $\lambda_{adk}^{\phi,r} += \theta_{dk}$  for each general topic  $k$  (equation (22))

**update**  $\lambda_{ad}^{\xi,r} += \xi_d$  (equation (23))

**update**  $\lambda_t^{\psi,r} += \epsilon_{dt}$  for each time interval  $t$  (equation (24))

**end**

**set**  $\mathbb{E}[\beta_k] = \lambda_k^{\beta} / \sum_v \lambda_{kv}^{\beta}$  for each general topic  $k$

**set**  $\mathbb{E}[\eta_a] = \lambda_a^{\eta} / \sum_v \lambda_{av}^{\eta}$  for each entity  $a$

**set**  $\mathbb{E}[\gamma_t] = \lambda_t^{\gamma} / \sum_v \lambda_{tv}^{\gamma}$  for each time interval  $t$

**set**  $\mathbb{E}[\phi_{ak}] = \lambda_{ak}^{\phi,s} / \lambda_{ak}^{\phi,r}$  for each entity  $a$  and general topic  $k$

**set**  $\mathbb{E}[\xi_a] = \lambda_a^{\xi,s} / \lambda_a^{\xi,r}$  for each entity  $a$

**set**  $\mathbb{E}[\psi_t] = \lambda_t^{\psi,s} / \lambda_t^{\psi,r}$  for each time interval  $t$

**end**

**return**  $\lambda$

---

| $f(t_d, t) \mathbb{E}[\epsilon_{dt}]$ | Date       | Author Entity | Subject                                                 |
|---------------------------------------|------------|---------------|---------------------------------------------------------|
| 6.86                                  | 1976-07-07 | Cairo         | Possible SC meeting on Israeli rescue operation         |
| 6.18                                  | 1976-07-10 | Kuwait        | Media reaction to Bicentennial summary                  |
| 6.15                                  | 1976-07-06 | Damascus      | Syria condemns Israeli operation to free Air France ... |
| 5.91                                  | 1976-07-08 | Tel Aviv      | Passengers comment on Air France hijacking              |
| 5.89                                  | 1976-07-06 | Stockholm     | Possible SC meeting on Israeli rescue operation         |
| 5.38                                  | 1976-07-09 | Nicosia       | Bicentennial activities in Cyprus                       |
| 5.09                                  | 1976-07-11 | State         | Security Council debate on Entebbe events CONFID...     |
| 4.77                                  | 1976-07-09 | State         | Travel of Peter M. Storm, House Budget Committee        |
| 4.76                                  | 1976-07-06 | Jidda         | Weekly Saudi Editorial Summary (June 30-July 6)         |
| 4.68                                  | 1976-07-08 | Lusaka        | SWAPO President seeks assessment of Kissinger-Vor...    |
| 4.56                                  | 1976-07-07 | Stockholm     | Ugandan role in Air France hijacking                    |
| 4.45                                  | 1976-07-06 | Karachi       | Transitional quarter funding for RSS travel             |
| 4.43                                  | 1976-07-06 | Athens        | Bicentennial anniversary in Greece                      |
| 4.37                                  | 1976-07-08 | Damascus      | Beirut travel                                           |
| 4.34                                  | 1976-07-10 | State         | Status of Mrs. Bloch                                    |
| 4.17                                  | 1976-07-07 | Hong Kong     | Hong Kong Communist press denounces Israeli resc...     |
| 4.12                                  | 1976-07-08 | Dar es Salaam | President Nyerere's fourth of July messages             |
| 4.09                                  | 1976-07-10 | Moscow        | Pravda and Krasnaya Zvezda on Entebbe rescue oper...    |

**Table 5:** Highest-ranked messages for the week immediately following the U.S. Bicentennial Celebration and Operation Entebbe. Capsule accurately recovers messages related to both of these real-world events. Typos are intentionally copied from the data.

## References

- Michael I. Jordan, Zoubin Ghahramani, Tommi S. Jaakkola, and Lawrence K. Saul. 1999. An introduction to variational methods for graphical models. *Machine Learning*, 37(2):183–233, November.
- Martin J. Wainwright and Michael I. Jordan. 2008. Graphical models, exponential families, and variational inference. *Foundations and Trends in Machine Learning*, 1(1-2):1–305, January.

| Top Terms                                                                                                                                                                                                                                                                                                                                                                                                                                                                                                                                                                                                                                                                                                                                                                                                                                                                                                                                                                                                                                                                                                                                                                                                                                                                                                                                                                                                                                                                                                                                                                                                                     |
|-------------------------------------------------------------------------------------------------------------------------------------------------------------------------------------------------------------------------------------------------------------------------------------------------------------------------------------------------------------------------------------------------------------------------------------------------------------------------------------------------------------------------------------------------------------------------------------------------------------------------------------------------------------------------------------------------------------------------------------------------------------------------------------------------------------------------------------------------------------------------------------------------------------------------------------------------------------------------------------------------------------------------------------------------------------------------------------------------------------------------------------------------------------------------------------------------------------------------------------------------------------------------------------------------------------------------------------------------------------------------------------------------------------------------------------------------------------------------------------------------------------------------------------------------------------------------------------------------------------------------------|
| church, vatican, catholic, bishop, pope, ford, cardinal, ban, religious, archbishop<br>program, university, grant, education, school, post, institute, research, center, american<br>security, council, terrorist, threat, sc, sabotage, protective, herein, unsc, honour<br>visit, hotel, schedule, arrival, arrive, depart, please, meet, day, room<br>labor, union, strike, ilo, employment, federation, afl cio, trade, worker, confederation<br>bank, credit, loan, investment, finance, payment, financial, eximbank, opic, central<br>law, case, court, legal, investigation, arrest, justice, sentence, trial, attorney<br>party, government, election, opposition, national, leader, campaign, vote, support, anti<br>tax, company, pay, lease, compensation, exemption, repatriation, income, taxation, fee<br>oil, petroleum, opec, crude, gulf, price, exploration, refinery, energy, company<br>israel, arab, israeli, middle, egypt, peace, plo, cairo, egyptian, lebanon<br>radio, television, broadcast, allotment, appropriation, obligation, zero, warc, transmitter, network<br>india, indian, pakistan, delhi, goi, ocean, bangladesh, transit, pakistani, afghan<br>turkish, turkey, cyprus, greek, greece, athens, ankara, morocco, cypriot, algeria<br>aid, relief, emergency, usaid, disaster, donor, wfp, sahel, ifad, unicef<br>aircraft, team, flight, clearance, transport, civair, aviation, traffic, charter, cargo<br>soviet, moscow, press, ussr, soviet union, american, one, war, communist, article<br>sea, zone, marine, maritime, fish, coastal, continental, territorial, mile, fishery |

**Table 6:** The highest-probability vocabulary terms for a selection of general topics (one per row) according to  $\mathbb{E}[\beta_1], \dots, \mathbb{E}[\beta_K]$ . These examples come from the analysis described in [section 5](#). Capsule identifies diplomatic themes that are relevant to any entity.

| Entity        | Top Terms                                                                       |
|---------------|---------------------------------------------------------------------------------|
| Ankara        | turkish, turkey, ankara, government, cyprus, greek, party, one, time            |
| Athens        | greek, athens, greece, gog, government, cyprus, turkish, press, minister        |
| Auckland      | new zealand, company, box, trade, contact, opportunity, united states           |
| Baghdad       | iraqi, iraq, goi, arab, state, regime, ministry, government, party              |
| Berlin        | berlin, frg, german, senat, time, bonn, trade, one, agreement                   |
| Bern          | swiss, bern, federal, bank, snb, gold, end, interest, national                  |
| Brussels      | belgian, belgium, brussels, government, firestone, european, ministry           |
| Budapest      | hungarian, hungary, trade, mudd, one, time, puja, well, policy                  |
| Buenos Aires  | argentine, argentina, goa, us, hill, government, one, press, police             |
| Cairo         | egyptian, cairo, egypt, arab, israeli, israel, peace, agreement, president      |
| Canberra      | australian, australia, goa, government, minister, whitlam, end, dfa, time       |
| Dakar         | senegalese, president, african, summary, conference, end, support, one          |
| Dar es Salaam | tangov, salaam, tanzanian, spain, president, government, african, one           |
| Guayaquil     | ecuador, ecuadorean, port, congen, one, tuna, local, time, boat                 |
| Islamabad     | pakistan, gop, government, one, party, minister, general, opposition, ppp       |
| Paris         | paris, france, rush, french, one, government, amconsul, quai, european          |
| Jerusalem     | jerusalem, bank, israeli, us, israel, plo, one, arab, unifil                    |
| Jidda         | saudi, jidda, saudi arabia, prince, us, fahd, one, time, government             |
| Johannesburg  | black, africa, african, trade, union, police, labor, one, committee             |
| Kabul         | afghan, government, goa, minister, one, pakistan, regime, time, ministry        |
| Lima          | peru, gop, lima, peruvian, dean, minister, general, marcona, government         |
| Lisbon        | portugal, portuguese, gop, lisbon, government, party, summary, minister         |
| London        | london, british, government, fco, labor, agreement, one, washdc, summary        |
| Madrid        | spanish, spain, madrid, one, govt, general, committee, government, time         |
| Nairobi       | kenya, nairobi, marshall, embassy, kenyan, unep, le, ref, state                 |
| Oslo          | norwegian, norway, soviet, government, minister, ministry, policy               |
| Ottawa        | canadian, canada, goc, ottawa, us, extaff, government, minister, federal        |
| Peking        | chinese, peking, uslo, china, people, teng, one, trade, delegation, hong        |
| Phnom penh    | penh, phnom, khmer, rice, fank, enemy, cambodia, government, dean               |
| Prague        | czechoslovak, goc, czech, trade, embassy, one, mfa, time, cssr                  |
| Quito         | ecuador, ecuadorean, gulf, government, minister, bloomfield, general, one       |
| Sao Paulo     | paulo, brazil, state, brazilian, president, government, congen, one, do         |
| Seoul         | korea, korean, rok, rokg, seoul, park, government, president, time              |
| Singapore     | singapore, asean, minister, government, one, prime, comment, vietnam            |
| Sofia         | bulgarian, trade, one, agreement, american, visit, committee, party             |
| Sydney        | australia, australian, one, general, american, state, government, post          |
| Tokyo         | japan, japanese, tokyo, fonoff, summary, miti, end, diet, time                  |
| Taipei        | taiwan, groc, china, chinese, government, american, one, local, republic        |
| The Hague     | dutch, netherlands, hague, government, minister, party, stoel, mfa, one         |
| USUN New York | committee, usun, priority, report, draft, resolution, sc, comite, rep, new york |
| Vancouver     | canada, government, canadian, british, columbia, pipeline, federal, editorial   |
| Zagreb        | yugoslav, yugoslavia, croatian, fair, belgrade, american, one, ina, summary     |
| Zurich        | swiss, congen, consulate, general, american, bern, dollar, shipment             |

**Table 7:** The highest-probability vocabulary terms for a selection of entity topics (one per row) according to  $\mathbb{E}[\eta_1], \dots, \mathbb{E}[\eta_A]$ . These examples come from the analysis described in [section 5](#). Capsule identifies themes and interests that are specific to the entities.

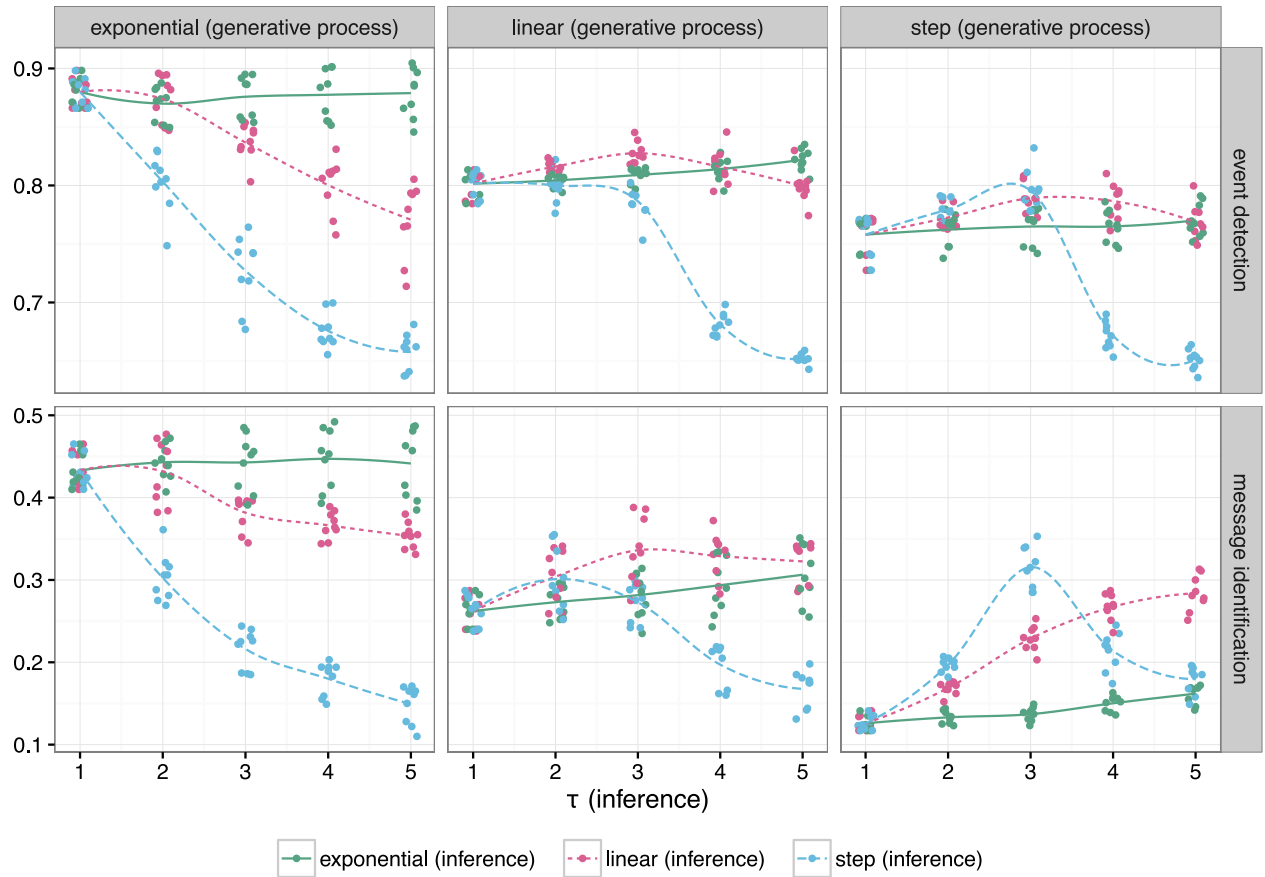

**Figure 7:** Capsule's sensitivity to several different decay functions (exponential, linear, and step) using simulated data. Capsule performs best when the decay function used in the inference algorithm matches the decay function used to generate the data. The exponential function is least sensitive to the value of  $\tau$  used to generate the data and the value of  $\tau$  used in the inference algorithm.
